# Supplementary material
Source: PubMed Central journal article supplement (PMC4510844)
Supplement: supp_128.13.2259_JCS162974.pdf [file supp_128.13.2259_JCS162974.pdf]

**Table S1. Strain list**

| Strain | Genotype                                                                                                                                                     | Source          |
|--------|--------------------------------------------------------------------------------------------------------------------------------------------------------------|-----------------|
| FY527  | <i>h- leu1-32 ura4-D18 his3-D1 ade6-M216</i>                                                                                                                 | S. Forsburg     |
| FY528  | <i>h+ leu1-32 ura4-D18 his3-D1 ade6-M210</i>                                                                                                                 | S. Forsburg     |
| TP38   | <i>h- cdc15-127 leu1-32</i>                                                                                                                                  | Lab Stock       |
| IRT012 | <i>h- rng2-D5 leu1-32, ura4-D18, ade6-M21X</i>                                                                                                               | Lab Stock       |
| TP60   | <i>myo2-E1 ura4-D18, leu1-32, ade6-M216</i>                                                                                                                  | Lab Stock       |
| TP6    | <i>cdc4-8 leu1-32, ade6-M216 his7-366</i>                                                                                                                    | Lab Stock       |
| MBY310 | <i>cdc12-112 ura4-D18, leu1-32, ade6-M210</i>                                                                                                                | Lab Stock       |
| VS1022 | <i>h clc1-mCherry-natMX6 ade6-M216 ura4-D18 his3-D1 leu1-32</i>                                                                                              | Lab Stock       |
| SP156  | <i>h- cwg1-2</i>                                                                                                                                             | Dr. Pilar Perez |
| AR210  | <i>h- [rga7::kanMX6 ura4-D18 his3-D1 ade6-M216 leu1-32</i>                                                                                                   | Lab Stock       |
| AR424  | <i>h- [rga7::ura4+ ura4-D18 his3-D1 ade6-M216 leu1-32</i>                                                                                                    | Lab Stock       |
| AR489  | <i>Δrga7::ura4 cdc12-112 ura4-D18, leu1-32, ade6-M210</i>                                                                                                    | Lab Stock       |
| AR491  | <i>h Δrga7::ura4 rng2-D5 leu1-32, ura4-D18, ade6-M21X</i>                                                                                                    | Lab Stock       |
| AR483  | <i>Δrga7::ura4 cdc4-8 leu1-32, ade6-M216</i>                                                                                                                 | Lab Stock       |
| AR485  | <i>Δrga7::kanMX6 cdc15-127</i>                                                                                                                               | Lab Stock       |
| AR728  | <i>h rga7-mEGFP-kanMX6 sad1-tdTomato-natMX6 ade6-M21X leu1-32 ura4-D18</i>                                                                                   | Lab Stock       |
| AR729  | <i>h- rlc1-mEGFP-natMX6 sad1-mCherry-natMX6 leu1-32 ura4-D18 his3-D1 ade6-M21X</i>                                                                           | Lab Stock       |
| AR730  | <i>h- [rga7::kanMX6 rlc1-mEGFP-natMX6 sad1-mCherry-natMX6 leu1-32 ura4-D18 his3-D1 ade6-M21X</i>                                                             | Lab Stock       |
| AR751  | <i>h rlc1-tdTomato-natMX6 rga7-mEGFP-kanMX6 ade6-M21X mcherry-atb2::hph leu1-32 ura4-D18</i>                                                                 | Lab Stock       |
| AR754  | <i>h rlc1-tdTomato-natMX6 rga7 FBD AH1-3-mEGFP-kanMX6 ade6-M21X mcherry-atb2::hph leu1-32 ura4-D18</i>                                                       | Lab Stock       |
| AR757  | <i>h [rga7::kanMX6 bgs1Δ::ura4+ P<sub>bgs1</sub><sup>+</sup>::GFP-bgs1<sup>+</sup>:leu1<sup>+</sup> leu1-32 mcherry-atb2::hph ura4-D18 his3-D1 ade6-M21X</i> | Lab Stock       |
| AR761  | <i>h rlc1-tdTomato-natMX6 rga7FBD AH1-2-mEGFP-kanMX6 ade6-M21X sad1-mcherry-natMX6 leu1-32 ura4-D18</i>                                                      | Lab Stock       |
| AR762  | <i>h rlc1-tdTomato-natMX6 rga7FBD AH1-mEGFP-kanMX6 ade6-M21X sad1-mcherry-natMX6 leu1-32 ura4-D18</i>                                                        | Lab Stock       |
| AR764  | <i>h bgs1Δ::ura4+ P<sub>bgs1</sub><sup>+</sup>::GFP-bgs1<sup>+</sup>:leu1<sup>+</sup> leu1-32 mcherry-atb2::hph ura4-D18 his3-D1 ade6-M21X</i>               | Lab Stock       |
| AR767  | <i>h sec72-mEGFP-kanMX6 clc1-mcherry-natmx6 leu1-32 ura4-D18 ade6-M21X</i>                                                                                   | Lab Stock       |
| AR776  | <i>h cdc12-112 rga7-mEGFP-kanMX6 ade6-M21X mcherry-atb2::hph leu1-32 ura4-D18</i>                                                                            | Lab Stock       |
| AR777  | <i>h sid2-250 rga7-mEGFP-kanMX6 ade6-M21X mcherry-atb2::hph leu1-32 ura4-D18</i>                                                                             | Lab Stock       |
| AR778  | <i>h bgs4Δ::ura4+ P<sub>bgs4</sub><sup>+</sup>::GFP-bgs4<sup>+</sup>:leu1<sup>+</sup> leu1-32 mcherry-atb2::hph ura4-D18 his3-D1 ade6-M21X</i>               | Lab Stock       |
| AR779  | <i>h [rga7::kanMX6 bgs4Δ::ura4+ P<sub>bgs4</sub><sup>+</sup>::GFP-bgs4<sup>+</sup>:leu1<sup>+</sup> leu1-32 mcherry-atb2::hph ura4-D18 his3-D1 ade6-M21X</i> | Lab Stock       |
| AR780  | <i>h for3-3GFP-kanMX6 mcherry-atb2::hph ade6-M21X leu1-32 ura4-D18</i>                                                                                       | Lab Stock       |
| AR781  | <i>h [for3::kanMX6rga7-mEGFP-kanMX6 sad1-mCherry-kanMX6</i>                                                                                                  | Lab Stock       |

| Strain | Genotype                                                                                                                                                                        | Source    |
|--------|---------------------------------------------------------------------------------------------------------------------------------------------------------------------------------|-----------|
|        | <i>ade6-M21X leu1-32 ura4-D18</i>                                                                                                                                               |           |
| AR782  | <i>h bgs4Δ::ura4<sup>+</sup> P<sub>bgs4</sub><sup>+</sup>::GFP-bgs4<sup>+</sup>:leu1<sup>+</sup> leu1-32 mcherry-atb2::hph clc1-mCherry-natMX6 ura4-D18 his3-D1 ade6-M21X</i>   | Lab Stock |
| AR783  | <i>h rlc1-tdTomato-natMX6 rga7FBD-mEGFP-kanMX6 ade6-M21X sad1-mcherry-natMX6 leu1-32 ura4-D18</i>                                                                               | Lab Stock |
| AR784  | <i>h rlc1-tdTomato-natMX6 rga7(1-870)-mEGFP-kanMX6 ade6-M21X sad1-mcherry-natMX6 leu1-32 ura4-D18</i>                                                                           | Lab Stock |
| AR785  | <i>h bgs4Δ::ura4<sup>+</sup> P<sub>bgs4</sub><sup>+</sup>::GFP-bgs4<sup>+</sup>:leu1<sup>+</sup> leu1-32 mcherry-atb2::hph rga7-tdTomato-natMX6 ade6-M21X ura4-D18</i>          | Lab Stock |
| AR786  | <i>h bgs4Δ::ura4<sup>+</sup> P<sub>bgs4</sub><sup>+</sup>::GFP-bgs4<sup>+</sup>:leu1<sup>+</sup> rga7-tdTomato-natMX6 ade6-M21X ura4-D18</i>                                    | Lab Stock |
| AR787  | <i>h- cwg1-2 Δrga7::kanMX6</i>                                                                                                                                                  | Lab Stock |
| AR788  | <i>h bgs4Δ::ura4<sup>+</sup> P<sub>bgs4</sub><sup>+</sup>::GFP-bgs4<sup>+</sup>:leu1<sup>+</sup> rga7FBD-mCherry-natMX6 mcherry-atb2::hph ade6-M21X leu1-32 ura4-D18</i>        | Lab Stock |
| AR789  | <i>h bgs4Δ::ura4<sup>+</sup> P<sub>bgs4</sub><sup>+</sup>::GFP-bgs4<sup>+</sup>:leu1<sup>+</sup> rga7 FBD AH1-3-mCherry-natMX6 mcherry-atb2::hph ade6-M21X leu1-32 ura4-D18</i> | Lab Stock |
